# Supplementary material for: Deleterious Associations of Sitting Time and Television Viewing Time With Cardiometabolic Risk Biomarkers: Australian Diabetes, Obesity and Lifestyle (AusDiab) study 2004–2005
Source: PubMed Central journal article supplement — Diabetes Care. 2009 Nov 16;33(2):327–34. doi: 10.2337/dc09-0493 (PMC2809275; doi:10.2337/dc09-0493), 2009-11-16
Supplement: supp_dc09-0493_dc09-0493_Online_Appendix.pdf [file supp_dc09-0493_dc09-0493_Online_Appendix.pdf]

**Appendix 1.** Standardized regression coefficients of sitting time (hours/day) and TV viewing time (hours/day) with continuous metabolic risk variables for women and for men.

|                                                                     | Sitting Time (hours/day) |                 | TV viewing time (hours/day) |                |
|---------------------------------------------------------------------|--------------------------|-----------------|-----------------------------|----------------|
|                                                                     | Women                    | Men             | Women                       | Men            |
| <b>Waist circumference, cm</b>                                      |                          |                 |                             |                |
| <i>Model A</i>                                                      | 0.11 (0.09)‡             | 0.08 (0.09)‡    | 0.15 (0.20)‡                | 0.08 (0.20)‡   |
| <i>Model B</i>                                                      | 0.11 (0.09)‡             | 0.08 (0.09)‡    | 0.12 (0.20)‡                | 0.06 (0.20)†   |
| <i>Model D</i> ¶                                                    | 0.08 (0.10)‡             | 0.07 (0.10)†    | 0.08 (0.22)‡                | 0.04 (0.21)    |
| <b>BMI, kg/m<sup>2</sup></b>                                        |                          |                 |                             |                |
| <i>Model A</i>                                                      | 0.11 (0.04)‡             | 0.05 (0.03)*    | 0.14 (0.09)‡                | 0.05 (0.07)*   |
| <i>Model B</i>                                                      | 0.12 (0.04)‡             | 0.05 (0.03)*    | 0.11 (0.09)‡                | 0.04 (0.07)*   |
| <i>Model D</i> ¶                                                    | 0.09 (0.04)‡             | 0.04 (0.04)     | 0.08 (0.10)‡                | 0.03 (0.08)    |
| <b>Systolic blood pressure, mmHg<sup>  </sup></b>                   |                          |                 |                             |                |
| <i>Model A</i>                                                      | 0.05 (0.13)†             | -0.05 (0.14)*   | 0.09 (0.28)‡                | 0.04 (0.30)    |
| <i>Model B</i>                                                      | 0.05 (0.13)†             | -0.05 (0.13)*   | 0.06 (0.28)‡                | 0.01 (0.30)    |
| <i>Model C</i>                                                      | 0.03 (0.13)              | -0.06 (0.13)†   | 0.03 (0.28)                 | -0.001 (0.29)  |
| <i>Model D</i>                                                      | 0.02 (0.14)              | -0.07 (0.14)†   | 0.03 (0.30)                 | 0.02 (0.30)    |
| <b>Diastolic blood pressure, mmHg<sup>  </sup></b>                  |                          |                 |                             |                |
| <i>Model A</i>                                                      | 0.07 (0.07)‡             | 0.04 (0.08)     | 0.09 (0.15)‡                | 0.04 (0.17)    |
| <i>Model B</i>                                                      | 0.07 (0.07)‡             | 0.03 (0.08)     | 0.07 (0.15)‡                | 0.04 (0.17)    |
| <i>Model C</i>                                                      | 0.05 (0.07)*             | 0.01 (0.08)     | 0.05 (0.15)†                | 0.03 (0.16)    |
| <i>Model D</i>                                                      | 0.03 (0.08)              | 0.004 (0.08)    | 0.04 (0.17)*                | 0.03 (0.17)    |
| <b>Triglycerides, mmol/L<sup>§</sup> (natural log transformed)</b>  |                          |                 |                             |                |
| <i>Model A</i>                                                      | 0.10 (0.003)‡            | 0.10 (0.004)‡   | 0.13 (0.01)‡                | 0.06 (0.01)†   |
| <i>Model B</i>                                                      | 0.10 (0.003)‡            | 0.10 (0.004)‡   | 0.09 (0.01)‡                | 0.04 (0.01)    |
| <i>Model C</i>                                                      | 0.06 (0.003)‡            | 0.07 (0.004)‡   | 0.05 (0.01)†                | 0.02 (0.01)    |
| <i>Model D</i>                                                      | 0.05 (0.003)*            | 0.07 (0.004)‡   | 0.04 (0.01)                 | 0.002 (0.01)   |
| <b>HDL-cholesterol mmol/L<sup>§</sup> (natural log transformed)</b> |                          |                 |                             |                |
| <i>Model A</i>                                                      | -0.05 (0.002)†           | -0.10 (0.002)‡  | -0.08 (0.004)‡              | -0.03 (0.004)  |
| <i>Model B</i>                                                      | -0.06 (0.002)‡           | -0.10 (-0.002)‡ | -0.04 (0.004)*              | -0.02 (0.004)  |
| <i>Model C</i>                                                      | -0.02 (0.002)            | -0.07 (0.002)‡  | -0.003 (0.004)              | -0.005 (0.004) |
| <i>Model D</i>                                                      | -0.03 (0.002)            | -0.07 (0.002)‡  | 0.01 (0.004)                | 0.02 (0.004)   |
| <b>Fasting plasma glucose, mmol/L (natural log transformed)</b>     |                          |                 |                             |                |
| <i>Model A</i>                                                      | 0.02 (0.001)             | 0.005 (0.001)   | 0.06 (0.002)†               | 0.06 (0.002)†  |
| <i>Model B</i>                                                      | 0.02 (0.001)             | 0.003 (0.001)   | 0.04 (0.002)*               | 0.06 (0.002)†  |
| <i>Model C</i>                                                      | -0.01 (0.001)            | -0.02 (0.001)   | 0.004 (0.002)               | 0.04 (0.002)*  |
| <i>Model D</i>                                                      | -0.02 (0.001)            | -0.04 (0.001)   | 0.01 (0.002)                | 0.05 (0.002)*  |
| <b>2-hr plasma glucose, mmol/L (natural log transformed)</b>        |                          |                 |                             |                |
| <i>Model A</i>                                                      | 0.06 (0.002)‡            | 0.06 (0.003)†   | 0.08 (0.004)‡               | 0.09 (0.005)‡  |
| <i>Model B</i>                                                      | 0.07 (0.002)‡            | 0.07 (0.003)†   | 0.05 (0.004)†               | 0.08 (0.006)‡  |
| <i>Model C</i>                                                      | 0.04 (0.002)*            | 0.05 (0.002)*   | 0.02 (0.004)                | 0.06 (0.005)†  |
| <i>Model D</i>                                                      | 0.04 (0.002)*            | 0.03 (0.003)    | 0.001 (0.005)               | 0.05 (0.006)*  |
| <b>Fasting insulin, pmol/L (natural log transformed)</b>            |                          |                 |                             |                |
| <i>Model A</i>                                                      | 0.12 (0.004)‡            | 0.12 (0.005)‡   | 0.14 (0.01)‡                | 0.10 (0.01)‡   |
| <i>Model B</i>                                                      | 0.12 (0.004)‡            | 0.11 (0.005)‡   | 0.10 (0.01)‡                | 0.08 (0.01)‡   |
| <i>Model C</i>                                                      | 0.06 (0.003)‡            | 0.06 (0.004)‡   | 0.03 (0.01)*                | 0.04 (0.01)†   |
| <i>Model D</i>                                                      | 0.05 (0.004)‡            | 0.05 (0.004)†   | 0.01 (0.01)                 | 0.03 (0.01)    |

**Notes:** Forced entry linear regression. Data presented as standardized beta coefficient (SE) \*p<0.05; †p<0.01; ‡p<0.001. Mean and statistical significance for insulin, triglycerides, HDL-cholesterol, fasting and 2-hr post load plasma glucose derived from natural log transformed values. Sitting time coefficients are based on self report data using the timeframe of a ‘typical’ weekday and weekend day, while TV viewing time is based on self-report data using the timeframe of the most recent 7 days.

**Model A:** Adjusted for age only.

**Model B:** adjusted for age, education, parental history of diabetes, employment status, cigarette smoking, total energy intake, alcohol intake, diet quality & total leisure-time physical activity time.

**Model C:** adjusted for all covariates plus waist circumference.

**Model D:** adjusts for all covariates, waist circumference and sitting or TV viewing time. §Additional adjustment for lipid lowering medication. || Additional adjustment for anti-hypertensive medication. ¶Model is not adjusted for waist circumference.

**Appendix 2:** Unstandardized regression coefficients of sitting time (hours/day) and TV viewing time (hours/day) with continuous metabolic risk variables for women and for men who achieved the physical activity guidelines.

|                                                                     | Sitting Time (hours/day) |                        | TV viewing time (hours/day) |                       |
|---------------------------------------------------------------------|--------------------------|------------------------|-----------------------------|-----------------------|
|                                                                     | Women                    | Men                    | Women                       | Men                   |
| <b>Waist circumference, cm</b>                                      |                          |                        |                             |                       |
| <i>Model A</i>                                                      | 0.43 (0.19,0.68)‡        | 0.34 (0.11,0.57)†      | 1.58 (1.04,2.11)‡           | 0.80 (0.31,1.28)‡     |
| <i>Model B</i>                                                      | 0.46 (0.21,0.70)‡        | 0.34 (0.11,0.57)†      | 1.36 (0.81,1.91)‡           | 0.57 (0.07, 1.06)*    |
| <i>Model D</i> ¶                                                    | 0.27 (0.01,0.53)*        | 0.29 (0.05,0.53)*      | 1.13 (0.54,1.72)‡           | 0.37 (-0.16,0.89)     |
| <b>BMI, kg/m<sup>2</sup></b>                                        |                          |                        |                             |                       |
| <i>Model A</i>                                                      | 0.17 (0.07,0.28)‡        | 0.09 (0.01,0.17)*      | 0.59 (0.36,0.81)‡           | 0.19 (0.01,0.36)*     |
| <i>Model B</i>                                                      | 0.19 (0.09,0.29)‡        | 0.10 (0.01,0.18)*      | 0.50 (0.27,0.73)‡           | 0.14 (-0.04,0.32)     |
| <i>Model D</i> ¶                                                    | 0.12 (0.01,0.23)*        | 0.09 (-0.002,0.17)     | 0.39 (0.15,0.64)†           | 0.08 (-0.11,0.27)     |
| <b>Systolic blood pressure, mmHg<sup>  </sup></b>                   |                          |                        |                             |                       |
| <i>Model A</i>                                                      | 0.13 (-0.22,0.48)        | -0.11 (-0.45,0.23)     | 1.12 (0.36,1.89)†           | 0.66 (-0.07,1.38)     |
| <i>Model B</i>                                                      | 0.23 (-0.11,0.57)        | -0.12 (-0.46,0.22)     | 0.71 (-0.06,1.48)           | 0.38 (-0.36,1.11)     |
| <i>Model C</i>                                                      | 0.08 (-0.26,0.41)        | -0.21 (-0.54,0.12)     | 0.28 (-0.47,1.04)           | 0.23 (-0.50,0.95)     |
| <i>Model D</i>                                                      | 0.04 (-0.32,0.40)        | -0.27 (-0.62,0.08)     | 0.25 (-0.56,1.07)           | 0.41 (-0.35,1.17)     |
| <b>Diastolic blood pressure, mmHg<sup>  </sup></b>                  |                          |                        |                             |                       |
| <i>Model A</i>                                                      | 0.11 (-0.08,0.30)        | 0.18 (-0.01,0.37)      | 0.67 (0.26,1.09)†           | 0.30 (-0.11,0.72)     |
| <i>Model B</i>                                                      | 0.14 (-0.05,0.33)        | 0.13 (-0.06,0.32)      | 0.62 (0.20,1.04)†           | 0.41 (-0.01,0.83)     |
| <i>Model C</i>                                                      | 0.08 (-0.11,0.26)        | 0.07 (-0.11,0.26)      | 0.44 (0.02,0.86)*           | 0.31 (-0.09,0.72)     |
| <i>Model D</i>                                                      | 0.005 (-0.19,0.20)       | 0.03 (-0.17,0.23)      | 0.44 (-0.02,0.89)           | 0.29 (-0.14,0.73)     |
| <b>Triglycerides, mmol/L<sup>§</sup> (natural log transformed)</b>  |                          |                        |                             |                       |
| <i>Model A</i>                                                      | 0.02 (0.01,0.02)‡        | 0.02 (0.01,0.03)‡      | 0.05 (0.03,0.06)‡           | 0.03 (0.01,0.05)*     |
| <i>Model B</i>                                                      | 0.02 (0.01,0.03)‡        | 0.02 (0.01,0.03)‡      | 0.04 (0.02,0.06)‡           | 0.02 (-0.01,0.04)     |
| <i>Model C</i>                                                      | 0.01 (0.003,0.02)‡       | 0.01 (0.004,0.02)†     | 0.02 (0.001,0.04)*          | 0.01 (-0.01,0.03)     |
| <i>Model D</i>                                                      | 0.01 (0.0002,0.02)*      | 0.01 (0.004,0.03)†     | 0.01 (-0.01,0.03)           | -0.002 (-0.03,0.02)   |
| <b>HDL-cholesterol mmol/L<sup>§</sup> (natural log transformed)</b> |                          |                        |                             |                       |
| <i>Model A</i>                                                      | -0.004 (-0.01,0.001)     | -0.01 (-0.02,-0.01)‡   | -0.01 (-0.02,-0.002)*       | -0.01 (-0.02,-0.001)* |
| <i>Model B</i>                                                      | -0.01 (-0.01,-0.0005)*   | -0.01 (-0.02,-0.01)‡   | -0.004 (-0.01,0.006)        | -0.01 (-0.02,0.002)   |
| <i>Model C</i>                                                      | -0.002 (-0.01,0.002)     | -0.01 (-0.01,-0.003)‡  | 0.005 (-0.005,0.01)         | -0.01 (-0.02,0.005)   |
| <i>Model D</i>                                                      | -0.003 (-0.01,0.001)     | -0.01 (-0.01,-0.003)‡  | 0.01 (-0.003,0.02)          | -0.0001 (-0.01,0.01)  |
| <b>Fasting plasma glucose, mmol/L (natural log transformed)</b>     |                          |                        |                             |                       |
| <i>Model A</i>                                                      | 0.0003 (-0.002,0.002)    | -0.0004 (-0.003,0.002) | 0.01 (0.002,0.01)†          | 0.005 (0.0002,0.01)*  |
| <i>Model B</i>                                                      | 0.0004 (-0.002,0.002)    | -0.001 (-0.003,0.001)  | 0.006 (0.002,0.01)†         | 0.004 (-0.0002,0.01)  |
| <i>Model C</i>                                                      | -0.001 (-0.003,0.001)    | -0.001 (-0.003,0.001)  | 0.002 (-0.002, 0.006)       | 0.003 (-0.001,0.01)   |
| <i>Model D</i>                                                      | -0.002 (-0.004,0.0003)   | -0.002 (-0.004,0.0003) | 0.004 (-0.001,0.01)         | 0.005 (-0.0002,0.01)  |
| <b>2-hr plasma glucose, mmol/L (natural log transformed)</b>        |                          |                        |                             |                       |
| <i>Model A</i>                                                      | 0.01 (0.005,0.01)‡       | 0.01 (0.004,0.02)†     | 0.02 (0.01,0.03)‡           | 0.02 (0.01,0.04)‡     |
| <i>Model B</i>                                                      | 0.01 (0.006,0.02)‡       | 0.01 (0.004,0.02)†     | 0.01 (0.003,0.03)*          | 0.02 (0.006,0.03)†    |
| <i>Model C</i>                                                      | 0.01 (0.003,0.01)‡       | 0.01 (0.002,0.01)†     | 0.006 (-0.005,0.02)         | 0.02 (0.003,0.03)*    |
| <i>Model D</i>                                                      | 0.01 (0.003,0.01)†       | 0.01 (0.0001,0.01)*    | -0.001 (-0.01,0.01)         | 0.01 (-0.002,0.03)    |
| <b>Fasting insulin, pmol/L (natural log transformed)</b>            |                          |                        |                             |                       |
| <i>Model A</i>                                                      | 0.02 (0.01,0.03)‡        | 0.02 (0.01,0.04)‡      | 0.05 (0.03,0.08)‡           | 0.06 (0.03,0.09)‡     |
| <i>Model B</i>                                                      | 0.03 (0.01,0.04)‡        | 0.02 (0.01,0.03)‡      | 0.04 (0.02,0.07)‡           | 0.05 (0.02,0.08)‡     |
| <i>Model C</i>                                                      | 0.01 (0.003,0.02)†       | 0.01 (0.0004,0.02)*    | 0.002 (-0.02,0.02)          | 0.03 (0.01,0.05)*     |
| <i>Model D</i>                                                      | 0.01 (0.004,0.02)†       | 0.01 (-0.003,0.02)     | -0.01 (-0.03,0.01)          | 0.02 (0.001,0.05)*    |

**Notes:** Forced entry linear regression. Data presented as unstandardized beta coefficient (95% CI) \*p≤0.05; †p≤0.01; ‡p≤0.001. Mean and statistical significance for insulin, triglycerides, HDL-cholesterol, fasting and 2-hr post load plasma glucose derived from natural log transformed values. Sitting time coefficients are based on self report data using the timeframe of a 'typical' weekday and weekend day, while TV viewing time is based on self-report data using the timeframe of the most recent 7 days.

**Model A:** Adjusted for age only.

**Model B:** adjusted for age, education, parental history of diabetes, employment status, cigarette smoking, total energy intake, alcohol intake, diet quality & total leisure-time physical activity time.

**Model C:** adjusted for all covariates plus waist circumference.

**Model D:** adjusts for all covariates, waist circumference and sitting or TV viewing time. §Additional adjustment for lipid lowering medication.|| Additional adjustment for anti-hypertensive medication. ¶Model is not adjusted for waist circumference.
